# Supplementary material for: PAWS1 controls Wnt signalling through association with casein kinase 1α
Source: PubMed Central journal article supplement (PMC5891436; doi:10.15252/embr.201744807), 2018-03-07

Figure 3A

green: anti-mouse  
red: anti-rabbit

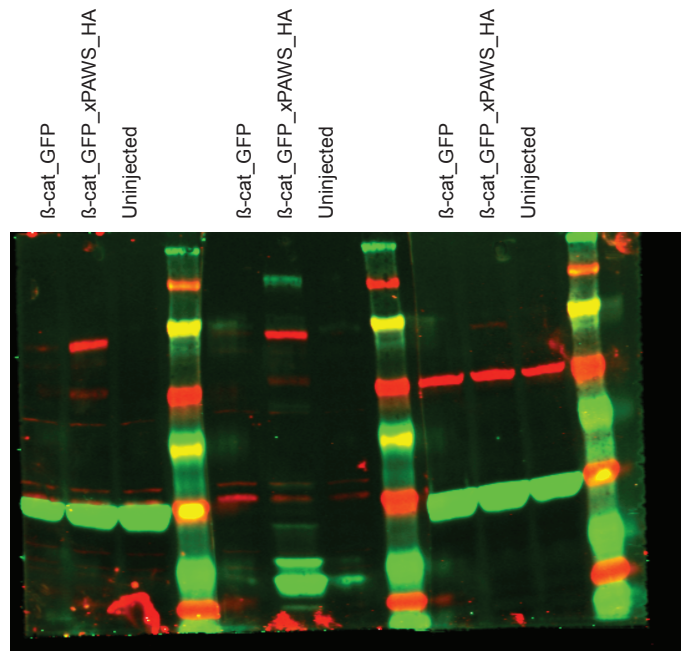

high green channel

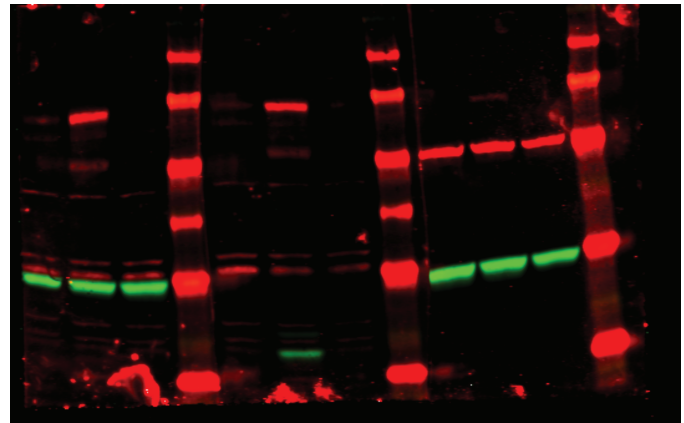

low green channel

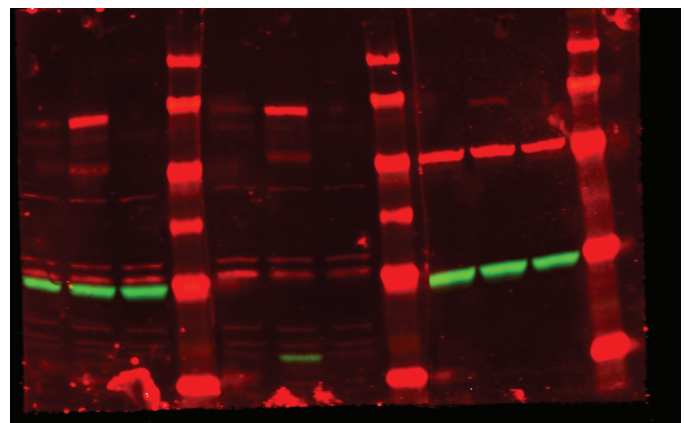

high red channel

antibodies

rabbit-anti-GFP  
mouse anti- tubulin

rabbit anti-GFP  
mouse anti-HA

rabbit anti-active b-cat  
mouse anti-tubulin

Figure 3B

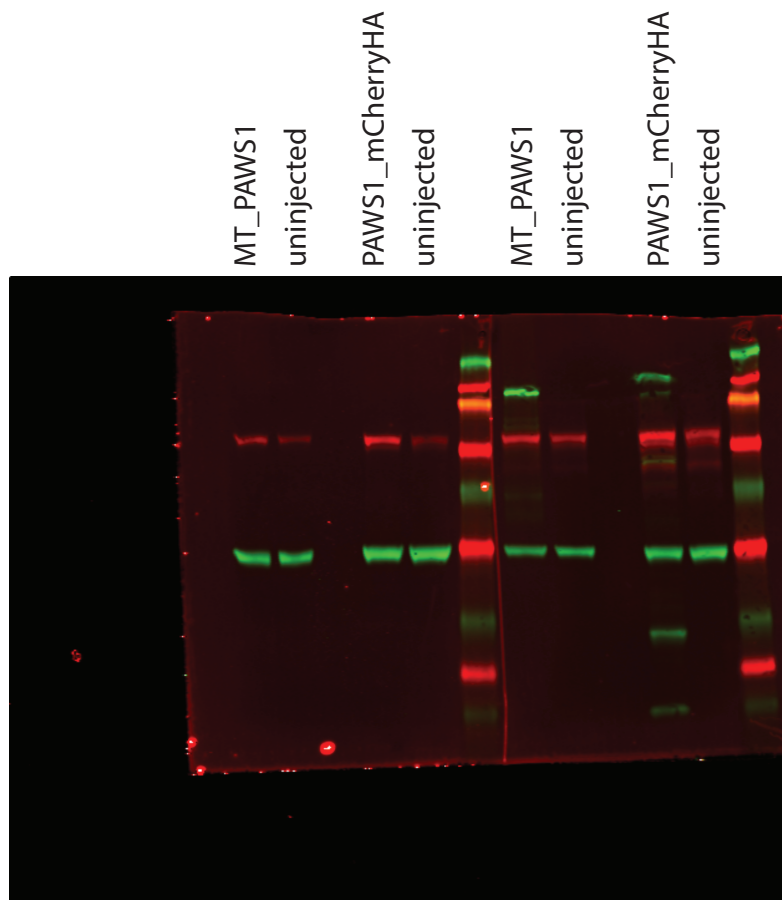

antibodies:

---

|                          |                    |
|--------------------------|--------------------|
| rabbit-anti-active b-cat | rabbit-anti-b-cat  |
| mouse-anti-tubulin       | mouse-anti-tubulin |
|                          | mouse-anti-HA      |
|                          | mouse-anti-MT      |

---

anti-rabbit: red channel  
anti-mouse: green channel

Fig 3E

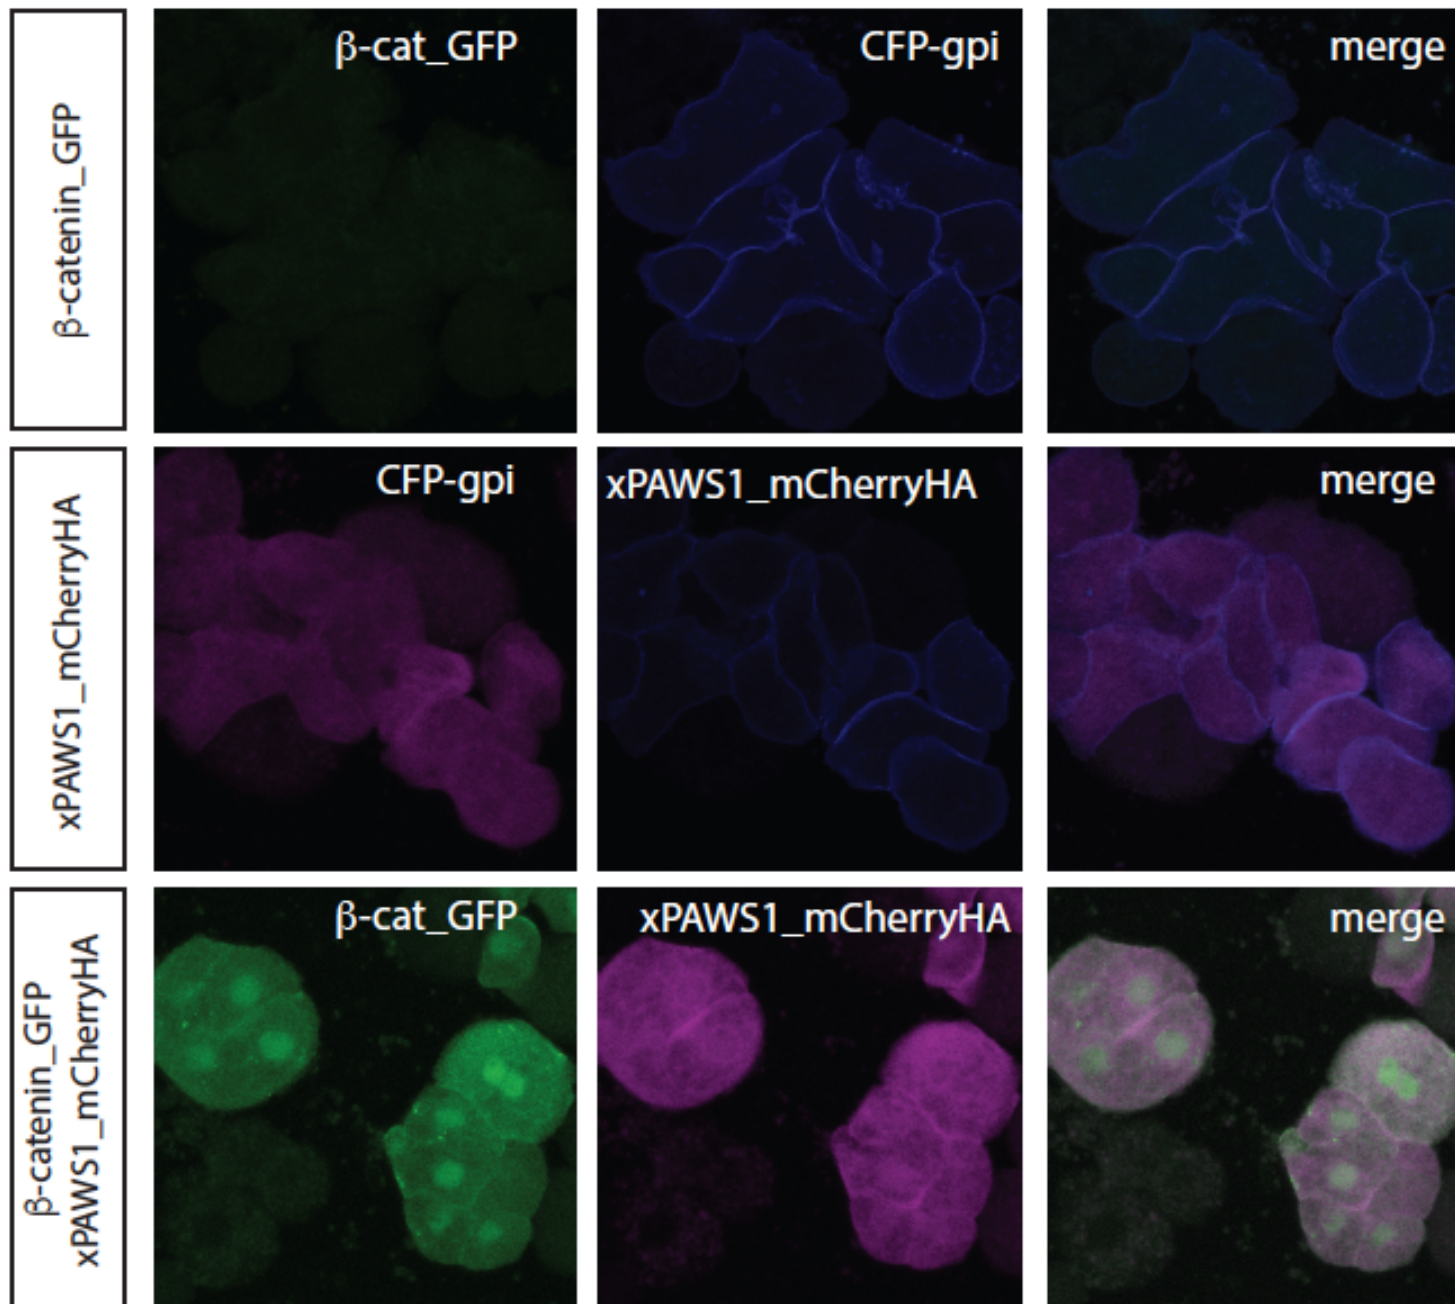

Supplement: EMBR-19-e44807-s003.pdf [file EMBR-19-e44807-s003.pdf]
