# Supplementary material for: PAWS1 controls Wnt signalling through association with casein kinase 1α
Source: PubMed Central journal article supplement (PMC5891436; doi:10.15252/embr.201744807), 2018-03-07

Figure 5B

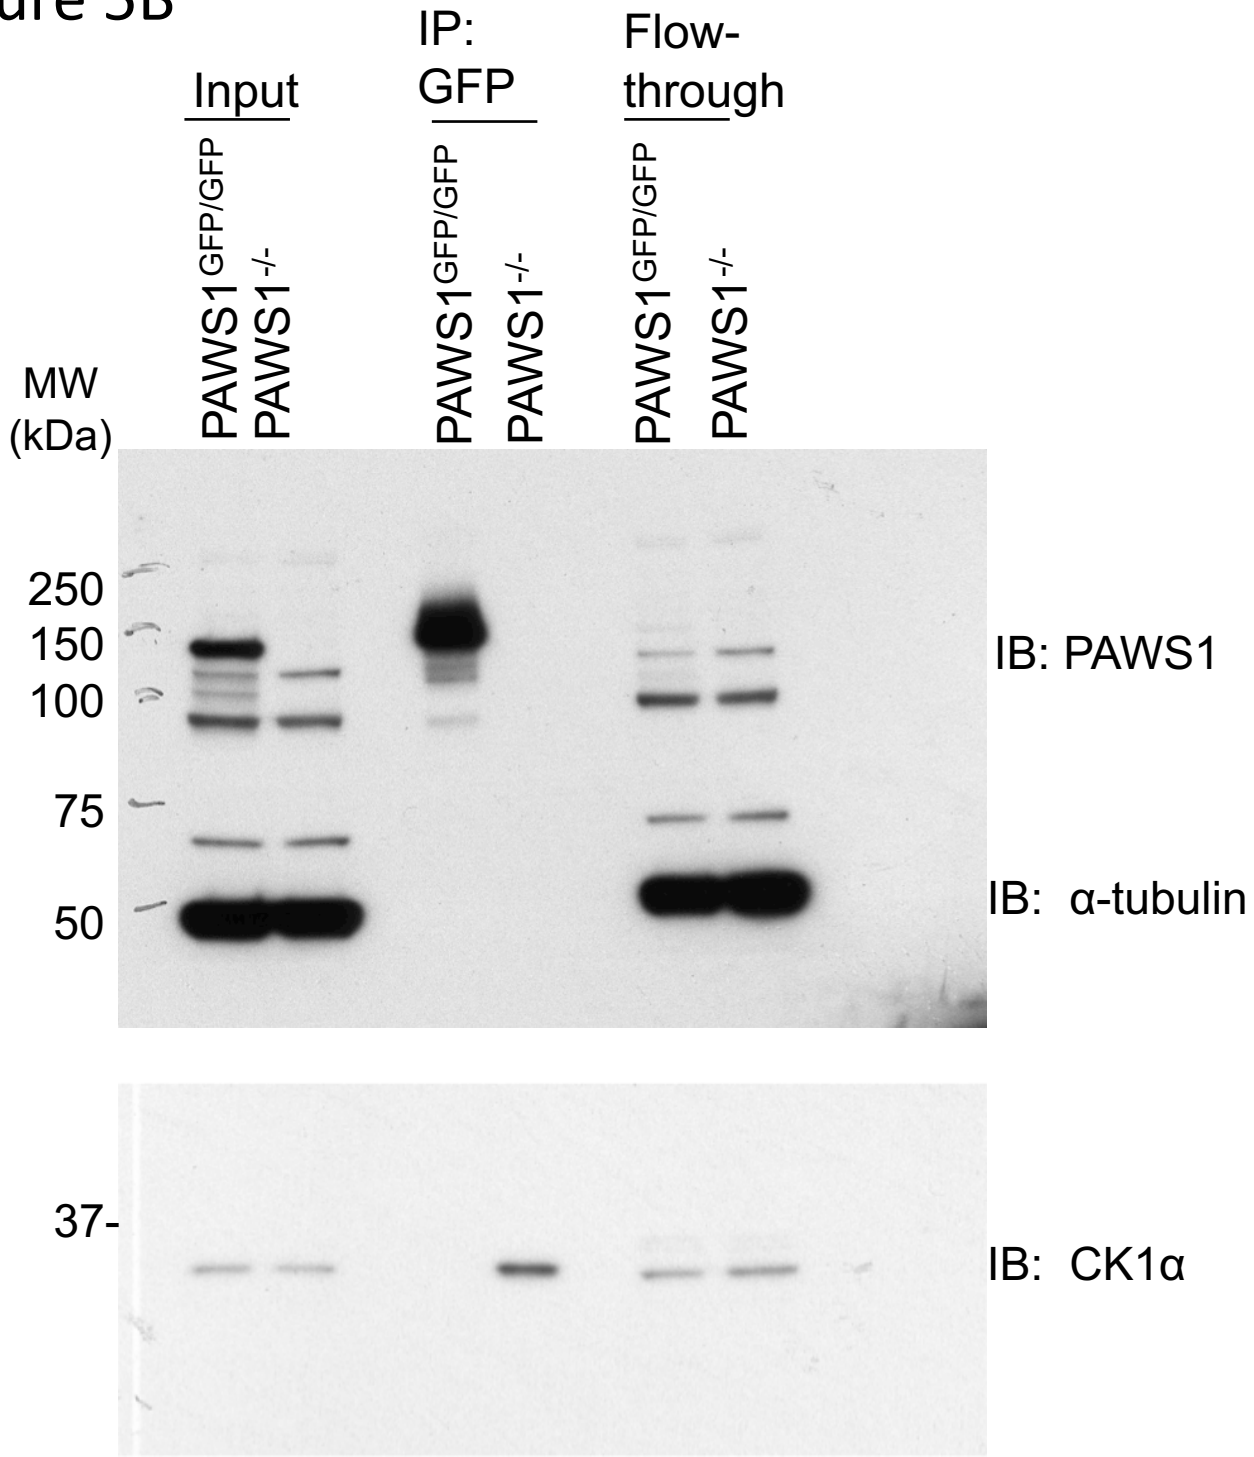

Figure 5C

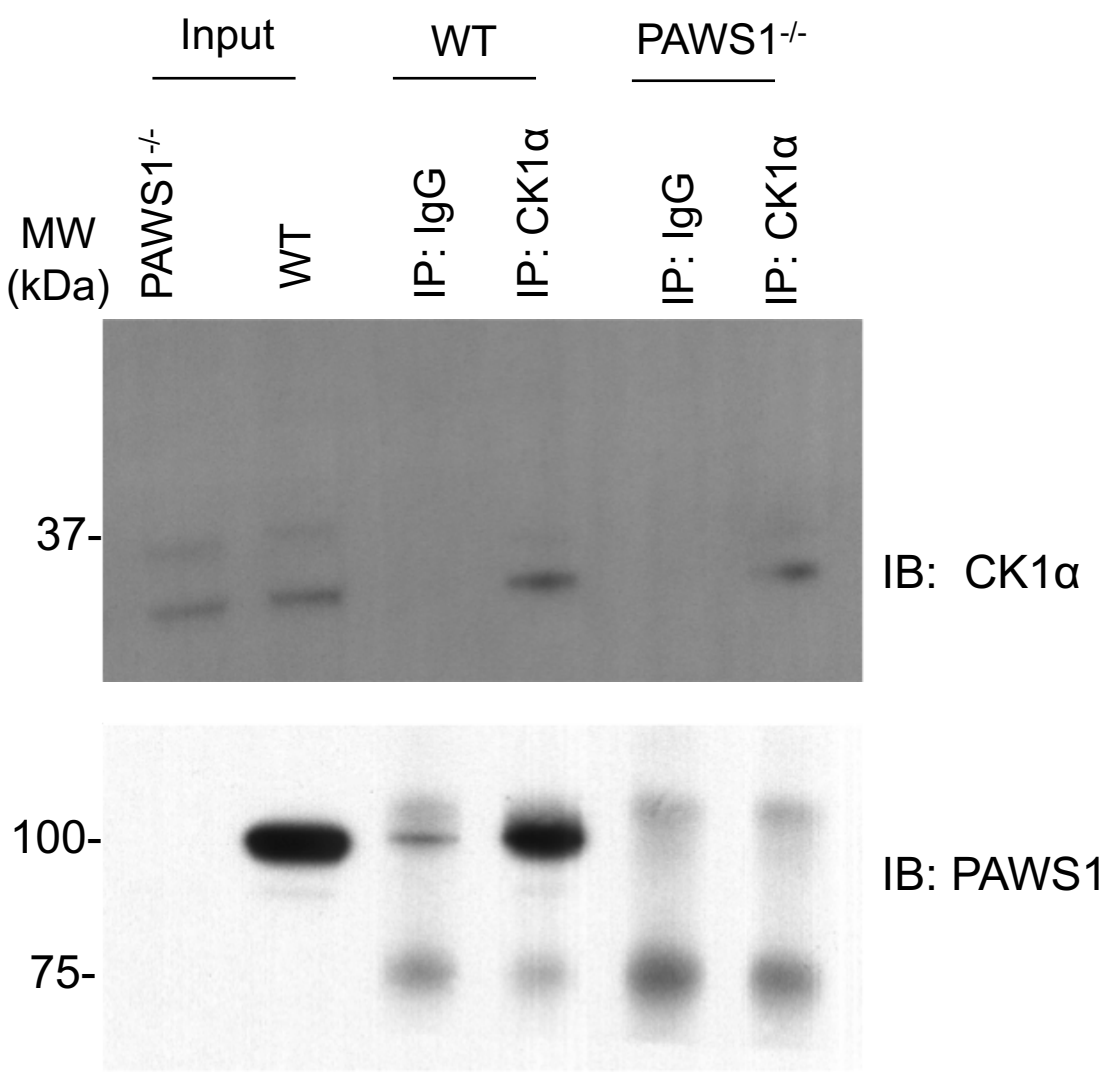

Figure 5D

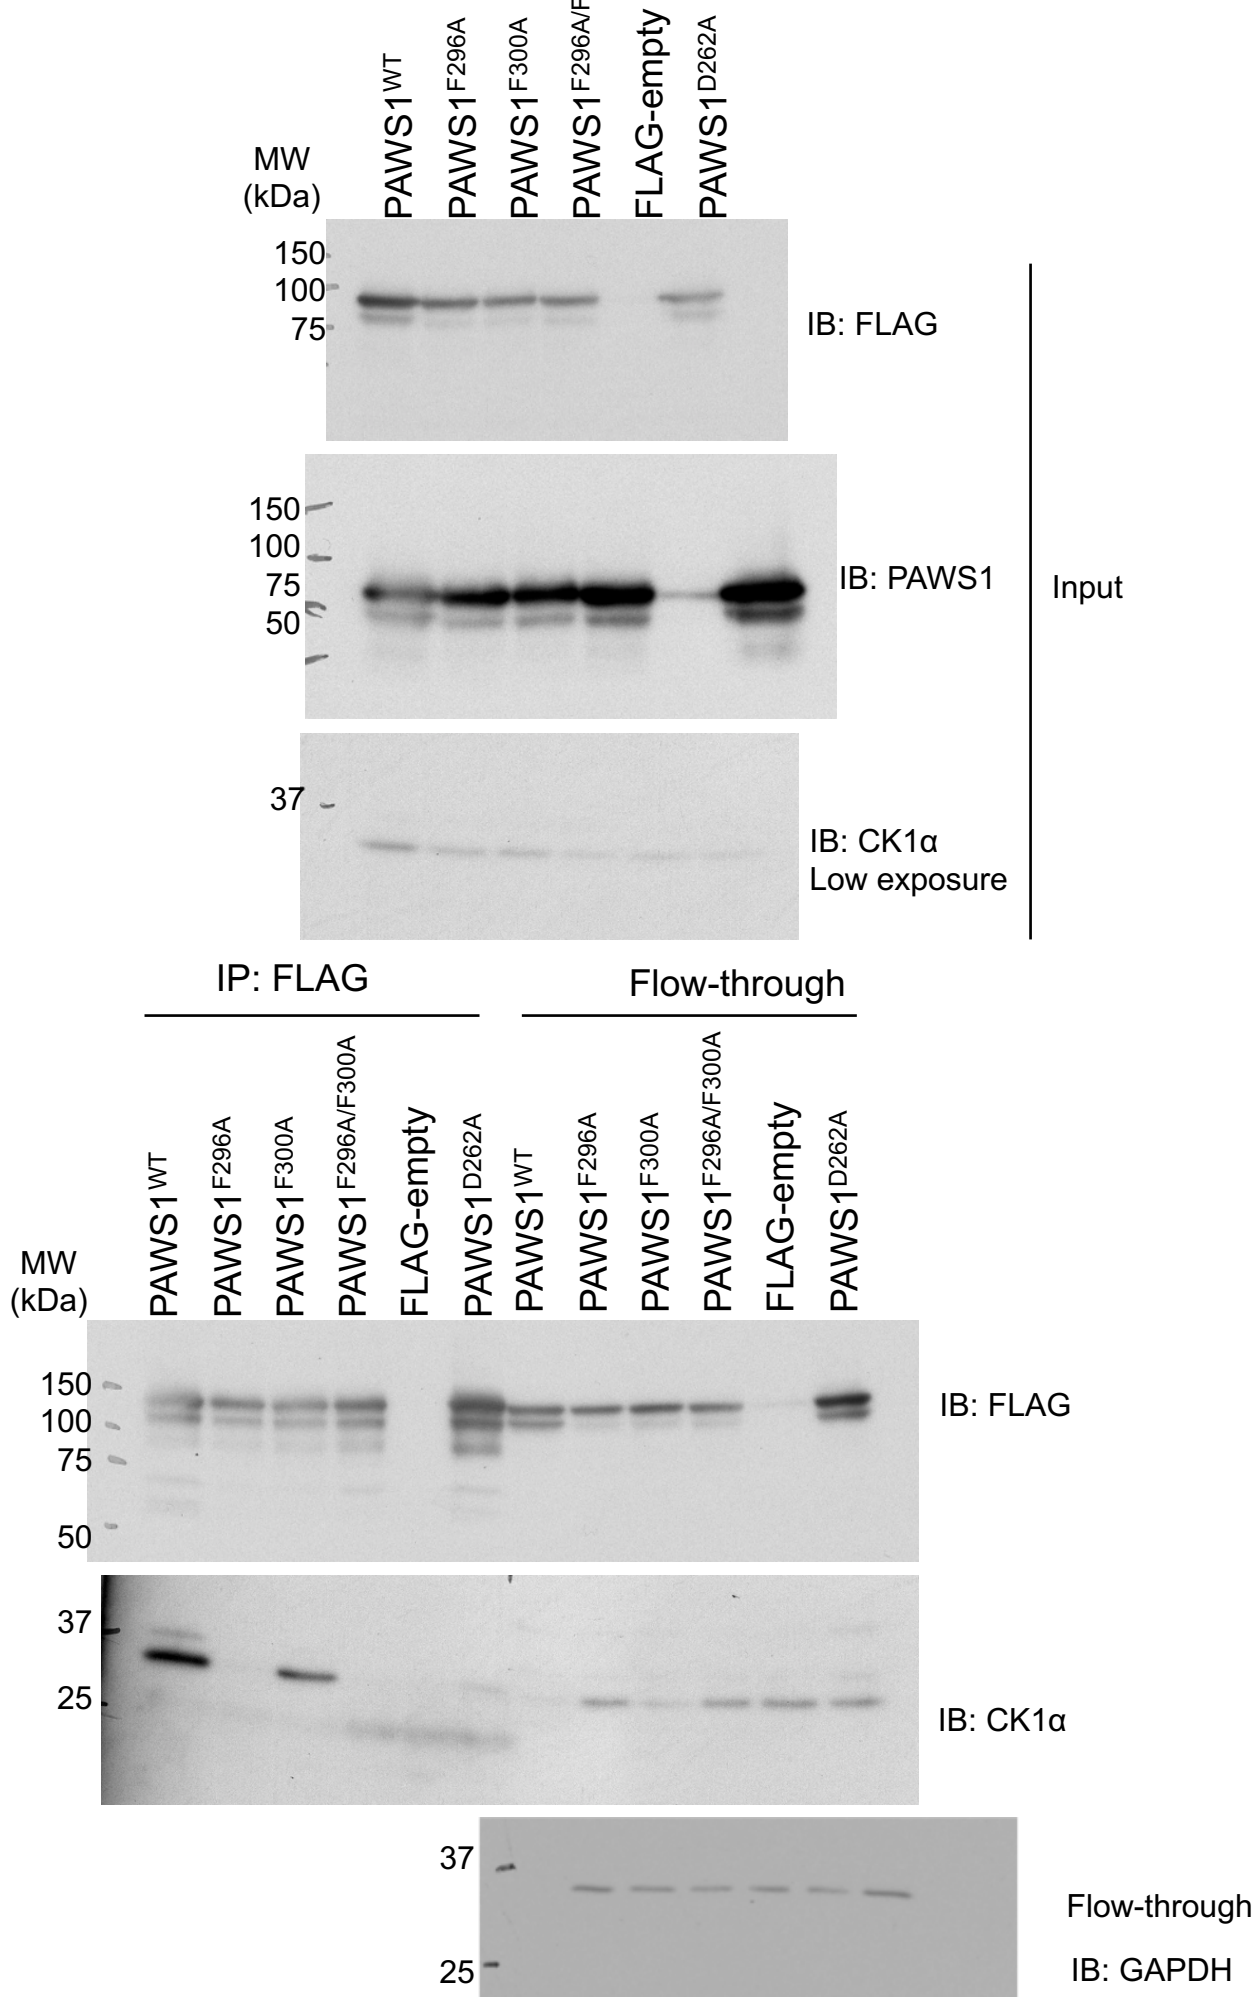

Figure 5E

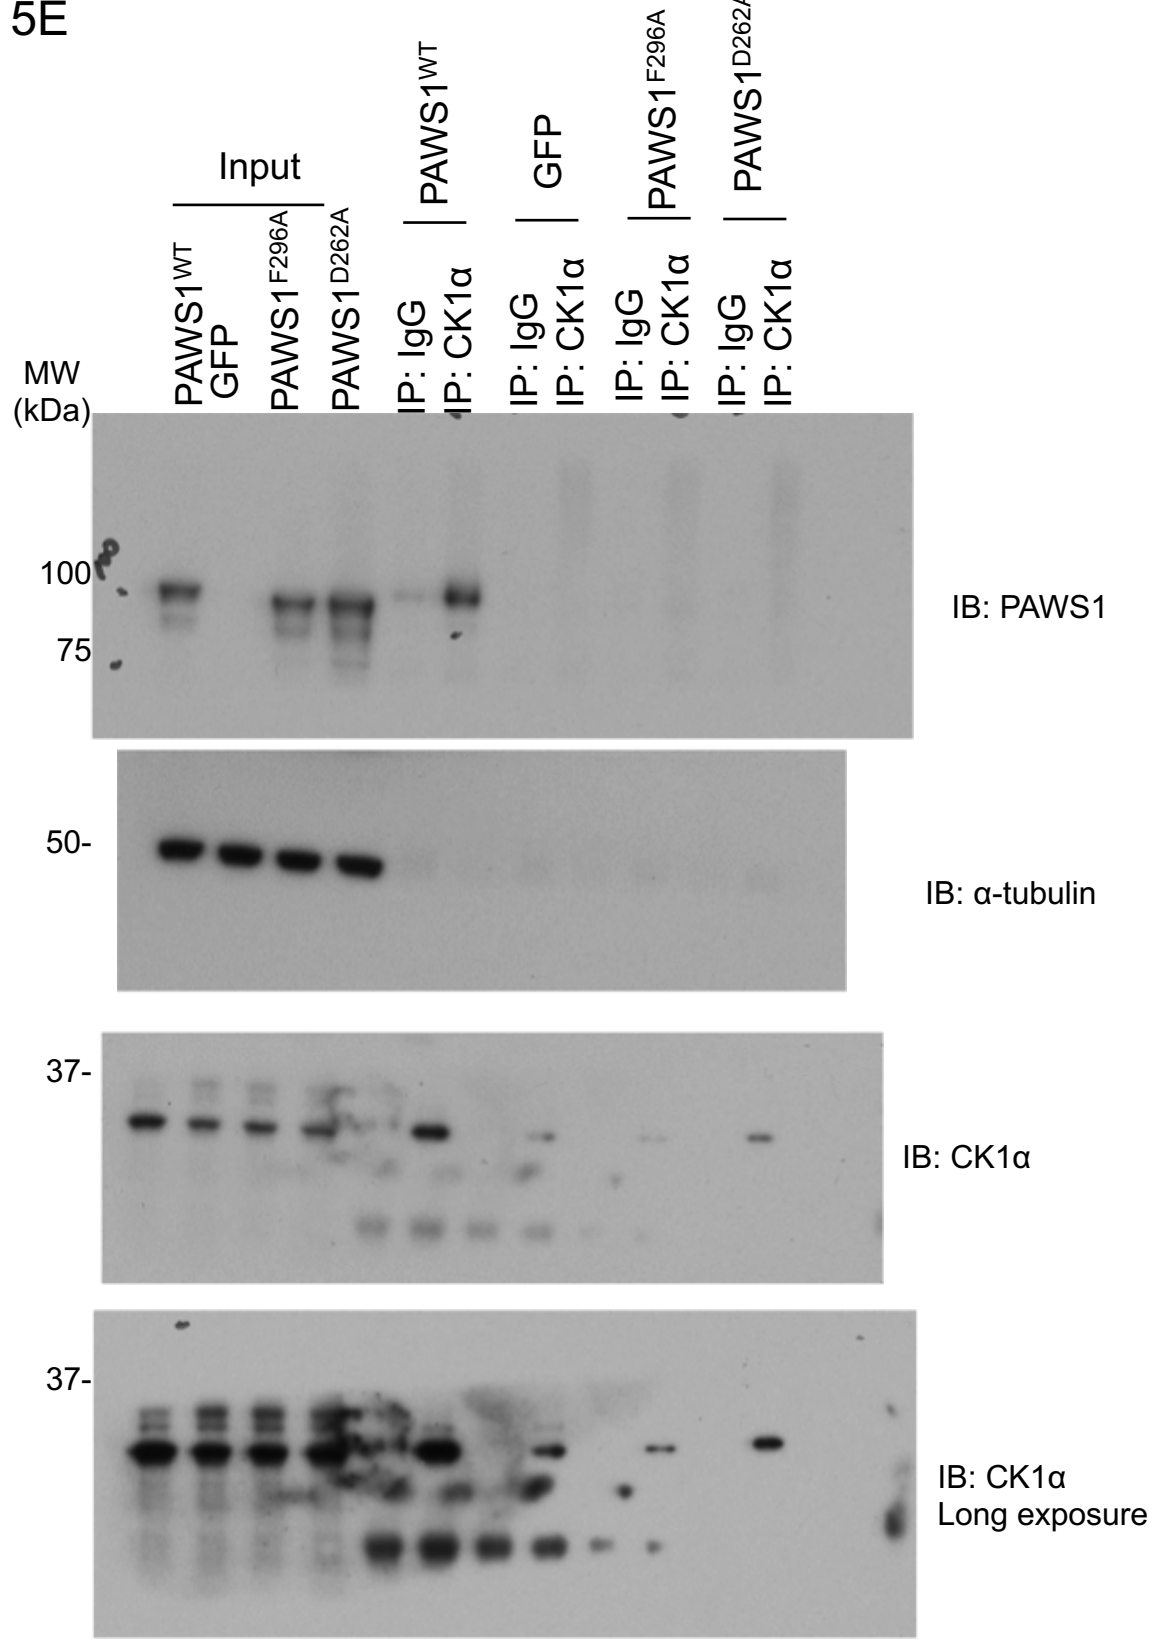

**Fig 5F**

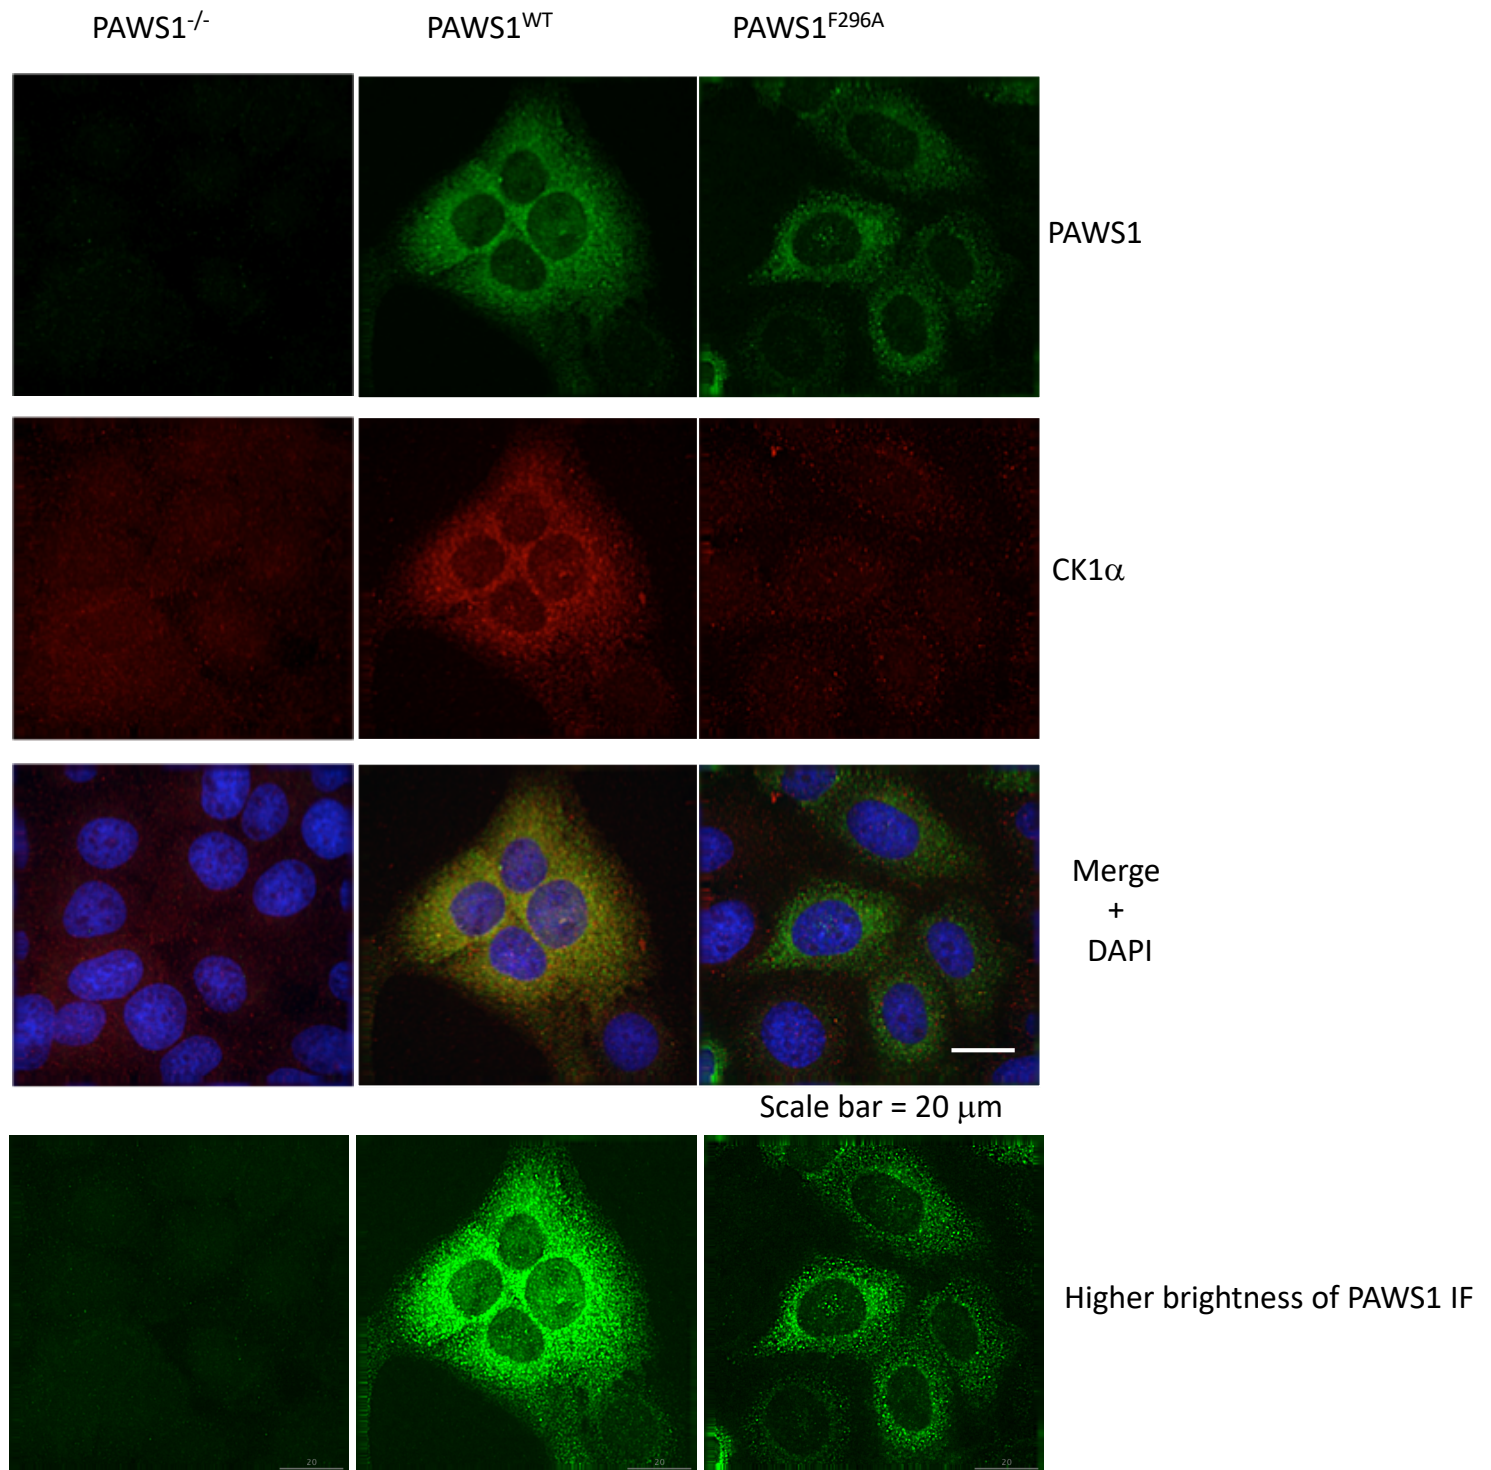

Supplement: EMBR-19-e44807-s004.pdf [file EMBR-19-e44807-s004.pdf]
