# Supplementary material for: PAWS1 controls Wnt signalling through association with casein kinase 1α
Source: PubMed Central journal article supplement (PMC5891436; doi:10.15252/embr.201744807), 2018-03-07

# Figure 8

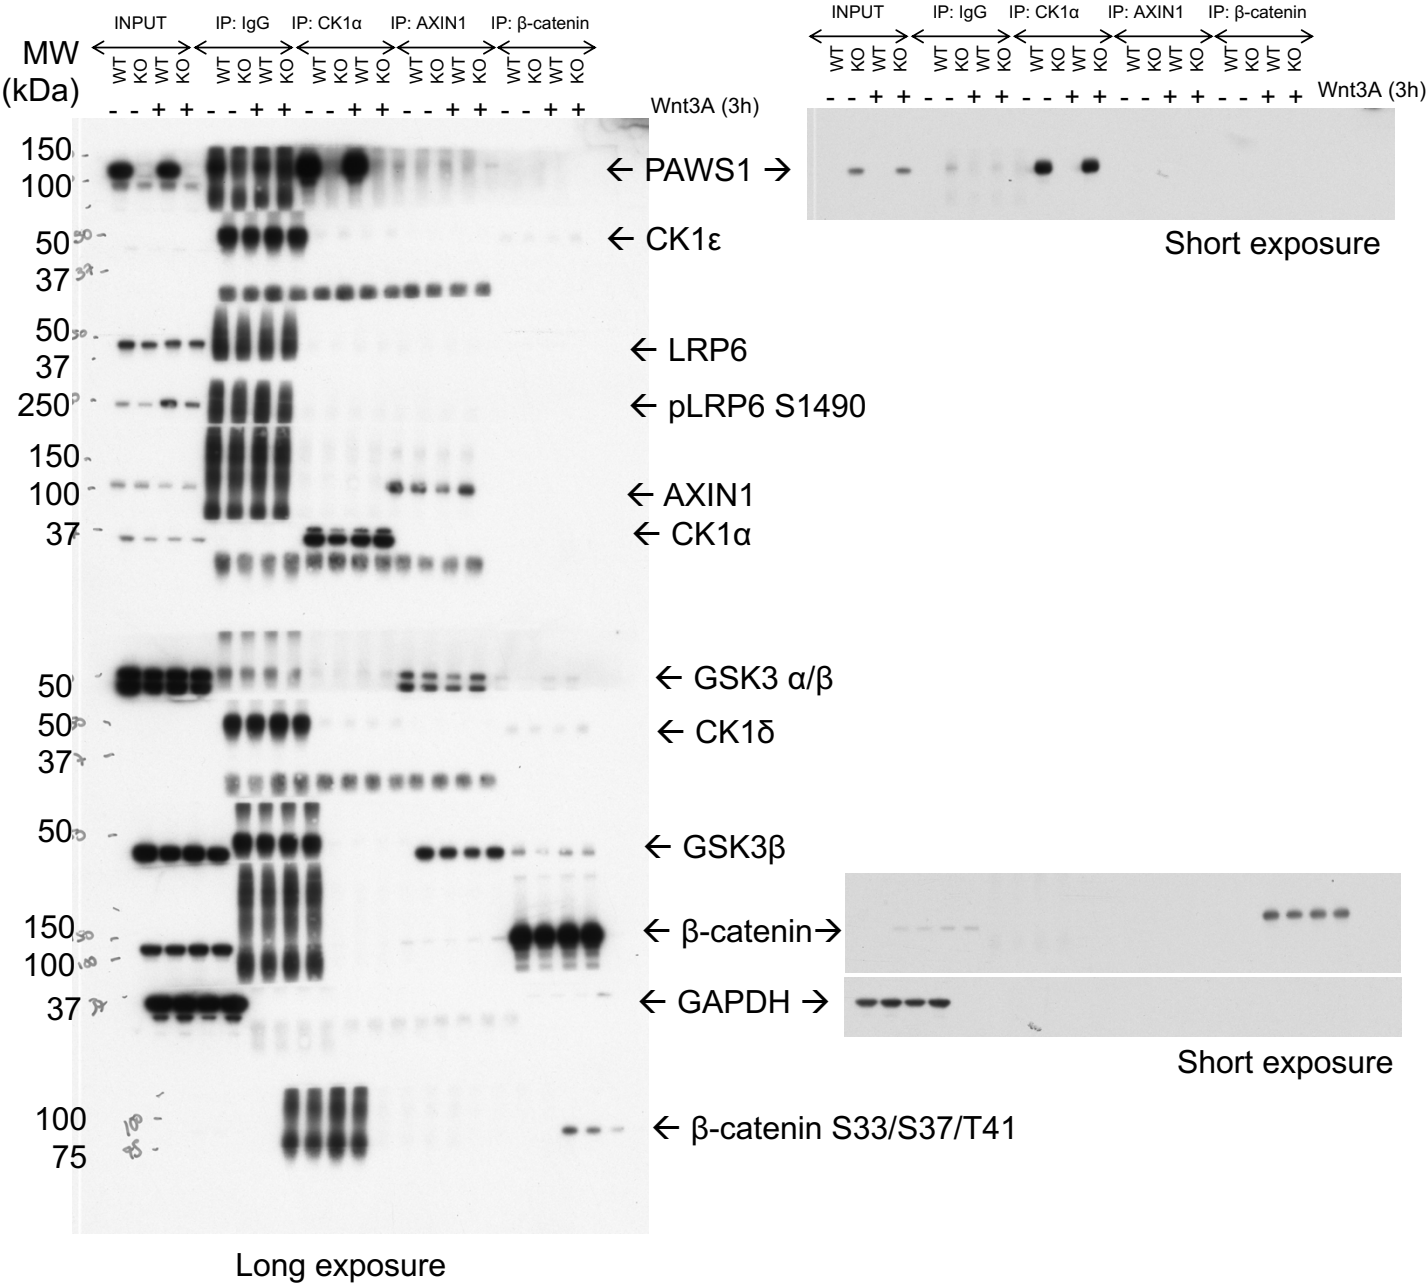

Supplement: EMBR-19-e44807-s007.pdf [file EMBR-19-e44807-s007.pdf]
